# Supplementary material for: Performance tuning of giant electrorheological fluids by interfacial tailoring
Source: Royal Society of Chemistry journal article supplement (doi:10.1039/c7sm02355c), 2018-01-01
Supplement: c7sm02355c1.pdf [file c7sm02355c1.pdf]

## Supplementary Information

### Performance tuning of giant electrorheological fluids by interfacial tailoring

Zhichao Xu<sup>a,b</sup>, Yaying Hong<sup>c</sup>, Mengying Zhang<sup>b</sup>, Jinbo Wu<sup>a,\*</sup> and Weijia Wen<sup>d,\*</sup>

<sup>a</sup> Materials Genome Institute, Shanghai University, Shanghai 200444, China

<sup>b</sup> College of Science, Department of Physics, Shanghai University, Shanghai 200444, China

<sup>c</sup> Ningbo Maxvit Technology Company Limited, Ningbo, China

<sup>d</sup> Department of Physics, Hong Kong University of Science and Technology, Hong Kong 999077, China

E-mail: [jinbowu@t.shu.edu.cn](mailto:jinbowu@t.shu.edu.cn); [phwen@ust.hk](mailto:phwen@ust.hk)

The rheological properties were measured with a circular-plate-type viscometer equipped with electrorheological modules (Haake mars3, Thermo Scientific, 8 mm diameter rotating disc with a gap of 1 mm between the rotor and stator) and a DC high-voltage source (SPELLMAN SL300). The software package RHEOWIN was used to collect the experimental data. A 50 s square voltage pulse was applied to the sample. To ensure the reproducibility and repeatability of the measurements, the ER fluids were re-dispersed before each measurement, and each measurement was repeated at least three times at 24°C. Yield point was obtained from the controlled shear stress mode measurements at a very low shear rate ( $0.1 \text{ s}^{-1}$ ).

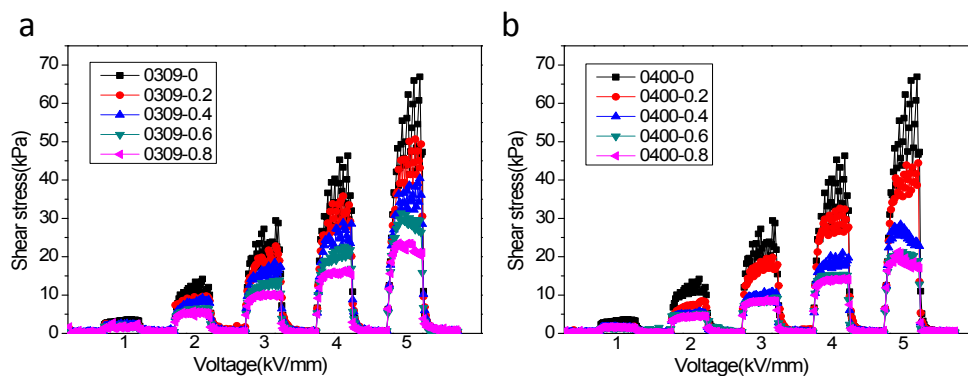

Figure 1 Yield stress of the GER fluids versus electric field strength
